# Supplementary material
Source: Research Square preprint supplement (doi:10.21203/rs.3.rs-10220825/v1)
Supplement: Supplementary file 1 [file 98554778cce038b1a9f6f05c.docx]

Supplementary Information for…

Nephelometer-based air sensor networks systematically underestimate PM2.5 in dust-influenced West Africa

Daniel M. Westervelt1*, Abhishek Anand1, Selina Amoah2, Benjamin Essien2, Kingsley Mawuli Amegah2, Clement Mensah Ackaah2, Esi Nerquaye Tetteh2, Nana Ama Browne Klutse2

1. Lamont-Doherty Earth Observatory of Columbia University, Palisades, NY, USA, 10964
2. Environmental Protection Authority, Accra, Ghana


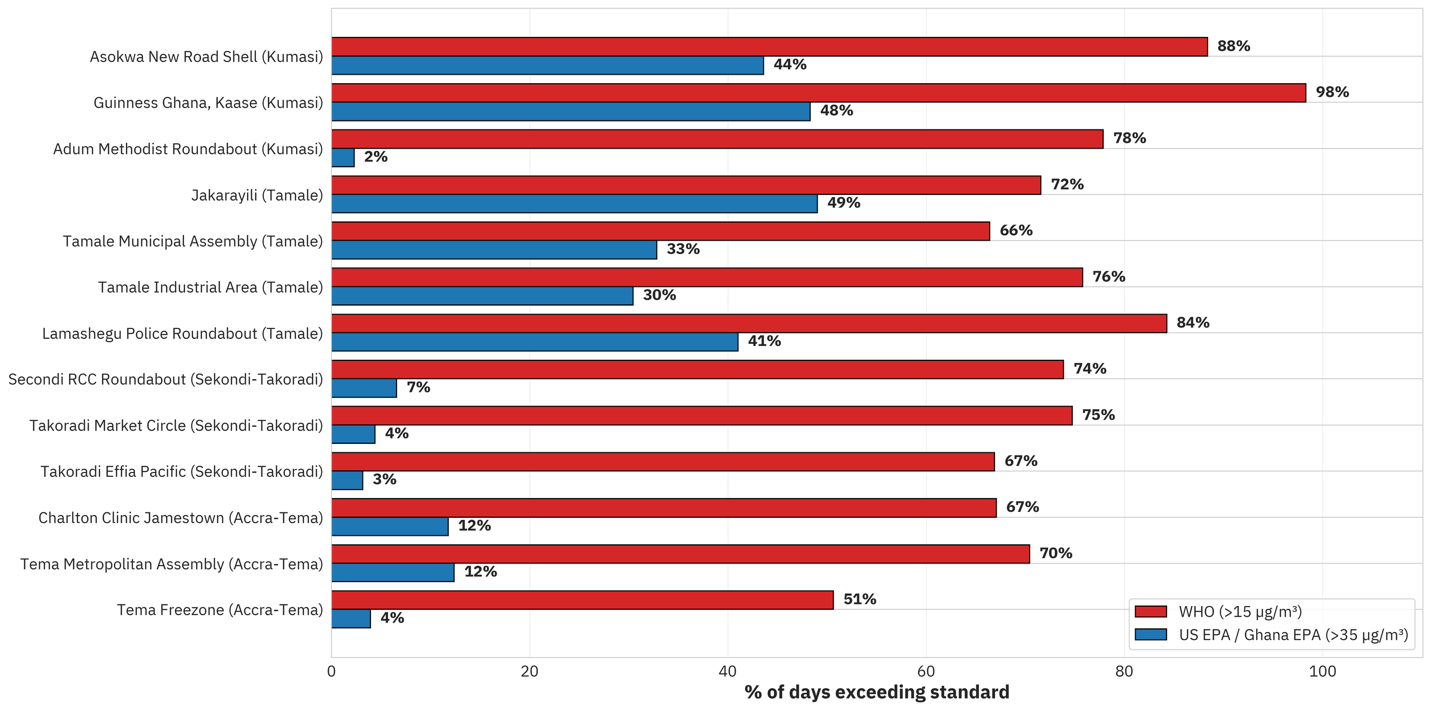


Figure S1: Percentage of days exceeding the 24-hour Ghana EPA PM2.5 standard and WHO Air Quality Guideline across the national network


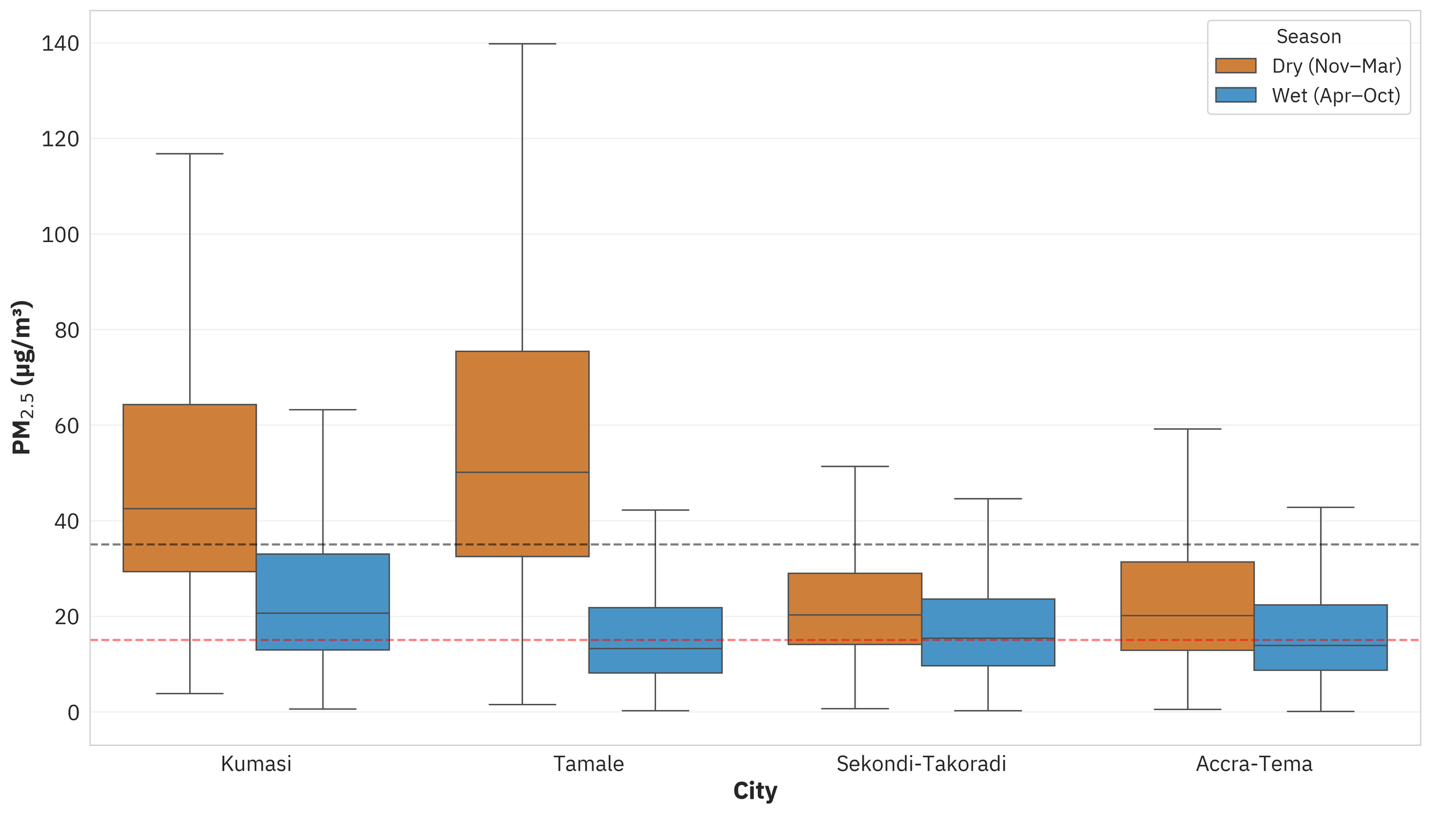


Figure S2: Box plots for dry and wet season daily mean PM2.5 at each city. Dashed-lines indicate


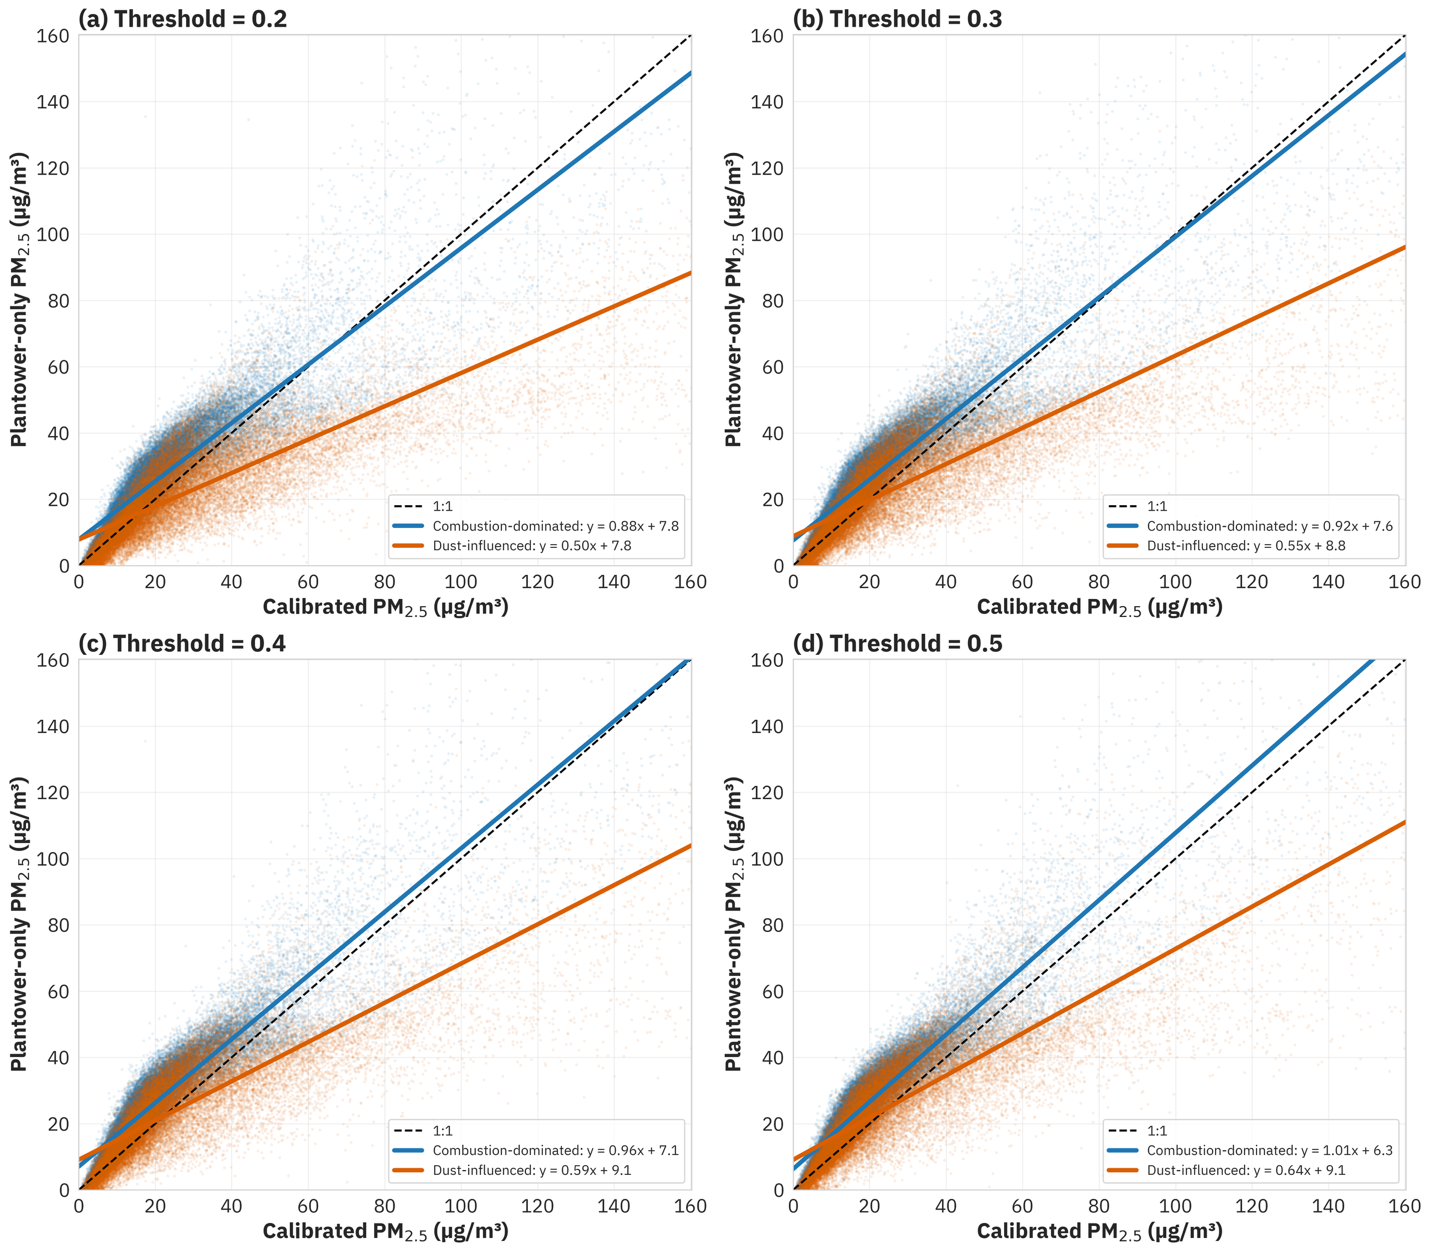


Figure S3: Scatterplots of Plantower-only PM2.5 versus MOD-PM calibrated PM2.5 using 4 alternative PM1:PM10 ratio thresholds: (a) 0.2, (b) 0.3, (c) 0.4, (d) 0.5


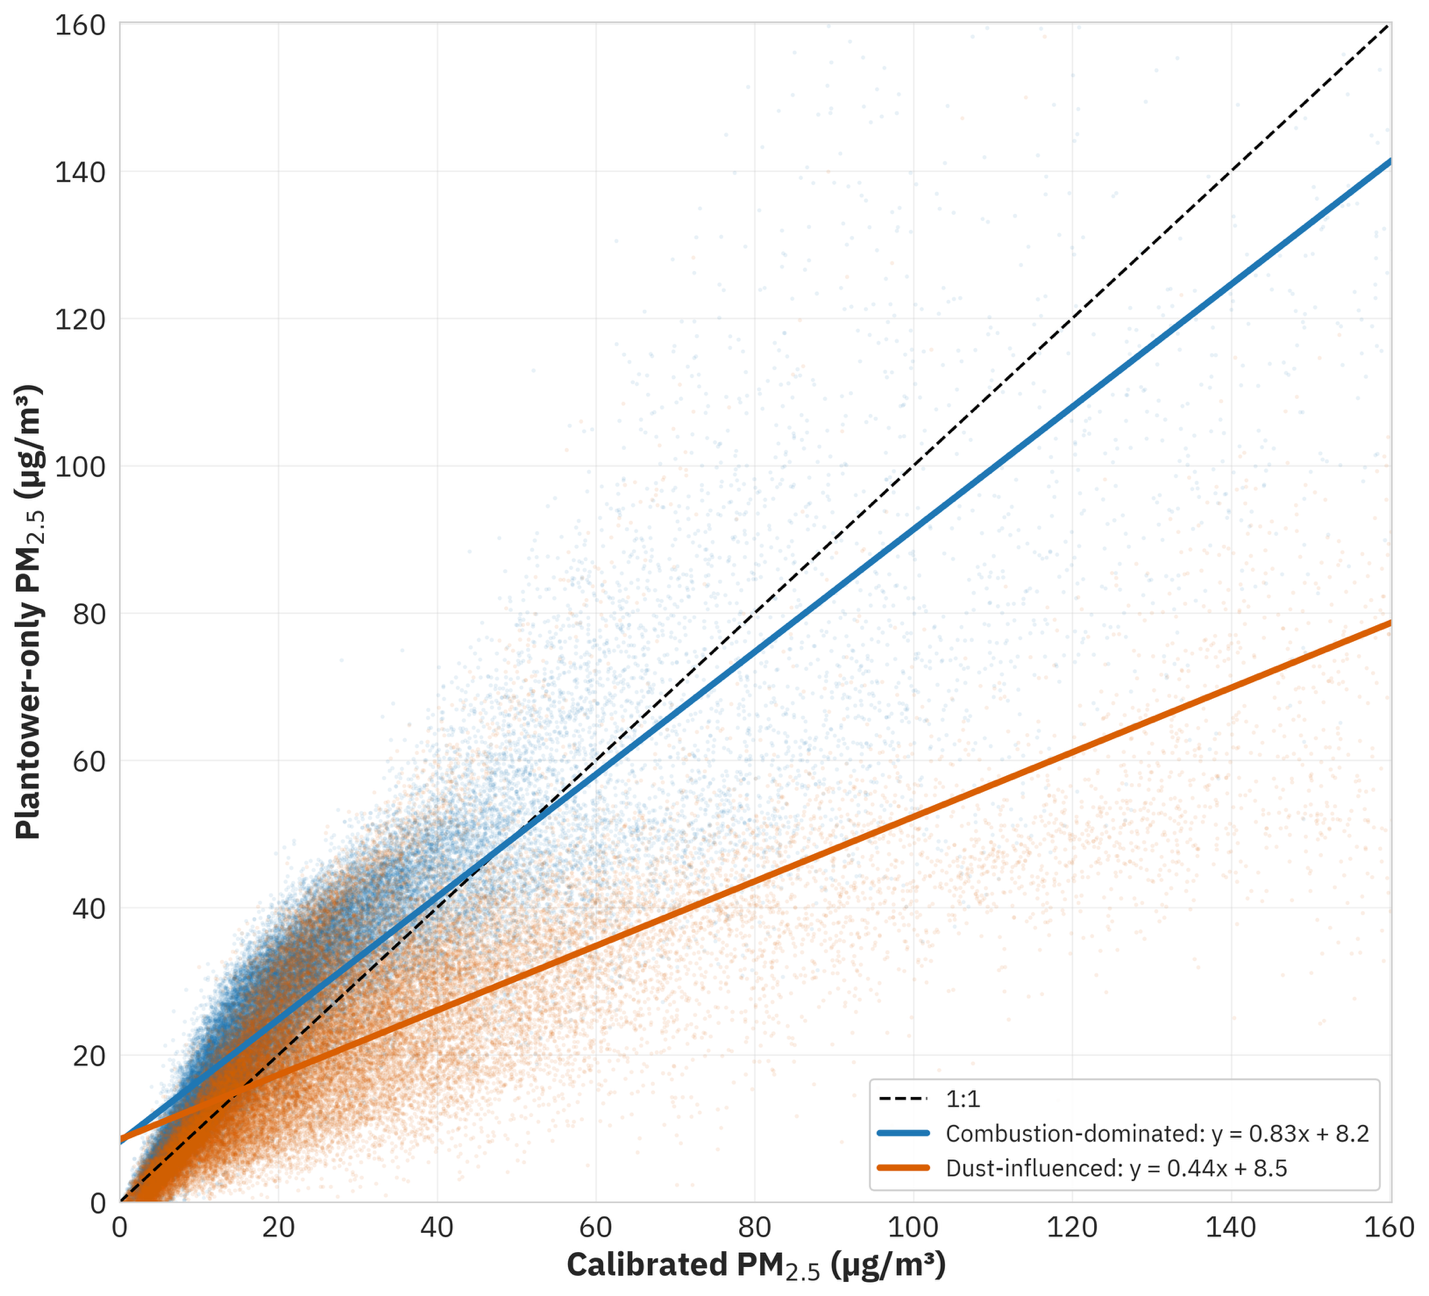


Figure S4: Scatterplots of Plantower-only PM2.5 versus MOD-PM calibrated PM2.5 using the PM2.5:PM10 ratio threshold of 0.1


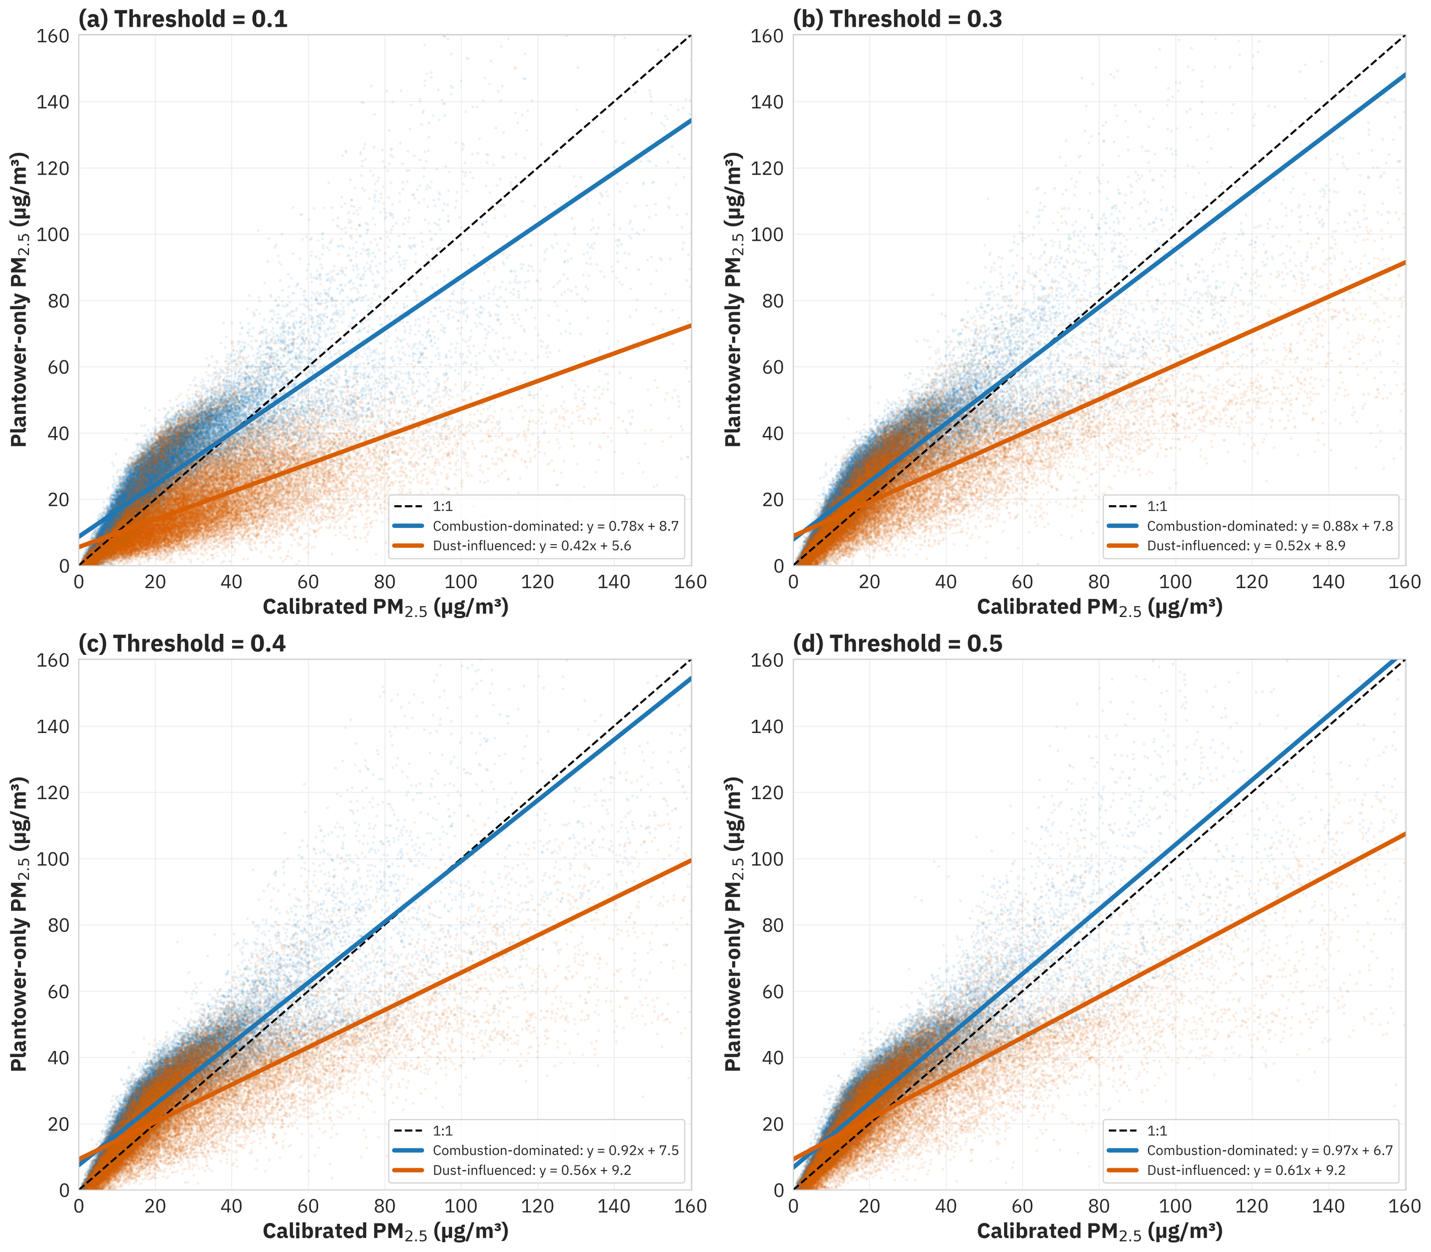


Figure S5: Scatterplots of Plantower-only PM2.5 versus MOD-PM calibrated PM2.5 using 4 alternative PM2.5:PM10 ratio thresholds: (a) 0.1, (b) 0.3, (c) 0.4, (d) 0.5
